# Supplementary material for: Remote Ischemic Preconditioning Neither Improves Survival nor Reduces Myocardial or Kidney Injury in Patients Undergoing Transcatheter Aortic Valve Implantation (TAVI)
Source: PubMed Central journal article supplement (PMC7019611; doi:10.3390/jcm9010160), 2020-01-07
Supplement: jcm-09-00160-s001.pdf [file jcm-09-00160-s001.pdf]

## Supplementary Tables

Table S1: Baseline characteristics of RIPC and unmatched control group

|                                 | RIPC group (n=66) | control group<br>(n=112) | p-Value |
|---------------------------------|-------------------|--------------------------|---------|
| <b>Age (years)</b>              | 82 (79-85)        | 83 (80-86)               | 0.292   |
| <b>Gender</b>                   |                   |                          |         |
| - female                        | 32 (49)           | 55 (49)                  | 1.000   |
| - male                          | 34 (52)           | 57 (51)                  |         |
| <b>Body-height (m)</b>          | 1.66 (0.09)       | 1.65 (0.09)              | 0.520   |
| <b>Body-weight (kg)</b>         | 80 (69.0-89.3)    | 75 (63.3-85.8)           | 0.082   |
| <b>BMI (kg/m<sup>2</sup>)</b>   | 28.2 (25.5-31.3)  | 27.5 (23.7-30.5)         | 0.113   |
| <b>LV-EF (%)</b>                | 55 (48-60)        | 55 (45-60)               | 0.793   |
| <b>Aortic stenosis</b>          |                   |                          |         |
| - Vmax (cm/sec)                 | 403.6 (94.3) [53] | 411.1 (79.5) [98]        | 0.605   |
| - dpmax (mmHg)                  | 72 (48-85) [63]   | 67 (50.0-82.5) [105]     | 0.773   |
| - dpmean (mmHg)                 | 40 (28-51) [63]   | 40 (30.0-51.8) [100]     | 0.850   |
| <b>CAD (stenosis &gt; 50%)</b>  | 33 (50.0)         | 53 (47.3)                | 0.758   |
| - PCI/CABG prior TAVI           | 26 (78.8)         | 42 (79.2)                | 0.873   |
| <b>Diabetes mellitus</b>        | 26 (39.4)         | 49 (43.8)                | 0.638   |
| - insulin dependent             | 11 (16.7)         | 23 (20.5)                | 0.561   |
| <b>Prior medication</b>         |                   |                          |         |
| - ACE-Inhibitor/<br>AT1-Blocker | 50 (75.8)         | 75 (67.0)                | 0.239   |
| - Beta-Blocker                  | 54 (81.8)         | 87 (77.7)                | 0.570   |
| - MRA                           | 6 (9.1)           | 11 (9.8)                 | 1.000   |
| <b>Heart rhythm</b>             |                   |                          |         |
| - atrial flutter/fibrillation   | 29 (43.9)         | 52 (46.4)                | 0.758   |
| - AV-Block (I-III)              | 14 (21.2)         | 16 (14.3)                | 0.300   |
| - branch block                  | 25 (37.9)         | 37 (33.0)                | 0.510   |
| - permanent<br>pacemaker        | 12 (18.2)         | 18 (16.1)                | 0.836   |
| <b>Euro-II-Score</b>            | 4.6 (2.9-7.6)     | 4.1 (2.8-7.1)            | 0.672   |
| <b>Valvetype</b>                |                   |                          |         |
| - Medtronic CoreValve           | 44 (66.7)         | 78 (69.6)                | 0.739   |
| - Edwards Sapien<br>XT/3        | 22 (33.3)         | 34 (30.4)                |         |
| <b>Prosthesis size</b>          | 27.5 (26-29)      | 26,0 (26-29)             | 0.978   |

|                                    |                       |                       |       |
|------------------------------------|-----------------------|-----------------------|-------|
| - 23 mm                            | 4 (6.1)               | 4 (3.6)               |       |
| - 26 mm                            | 29 (43.9)             | 56 (50.0)             |       |
| - 29 mm                            | 31 (47.0)             | 45 (40.2)             |       |
| - 31 mm                            | 2 (3.0)               | 7 (6.3)               |       |
| <b>n-dilatations</b>               | 2 (1-2)               | 2 (1-2)               |       |
| - 1                                | 18 (27.3)             | 30 (26.8)             |       |
| - 2                                | 40 (60.6)             | 69 (61.6)             | 0.980 |
| - 3                                | 6 (9.1)               | 12 (10.7)             |       |
| - 4                                | 2 (3.0)               | 0 (0.0)               |       |
| - 5                                | 0 (0.0)               | 1 (0.9)               |       |
| <b>n-pacing runs</b>               | 2 (2-3)               | 3 (2-3)               |       |
| - 2                                | 40 (60.6)             | 54 (48.2)             |       |
| - 3                                | 18 (27.3)             | 48 (42.9)             | 0.246 |
| - 4                                | 6 (9.1)               | 9 (8.0)               |       |
| - 5                                | 2 (3.0)               | 0 (0.0)               |       |
| - 6                                | 0 (0.0)               | 1 (0.9)               |       |
| <b>Procedure duration (min)</b>    | 53.5 (41.0-71.3)      | 50.0 (41-60)          | 0.285 |
| <b>Contrast medium volume (ml)</b> | 130 (120-150)         | 125 (100-150)         | 0.072 |
| <b>Blood analysis prior TAVI</b>   |                       |                       |       |
| - hsTnT (ng/l)                     | 27 (14.8-34.3)        | 24 (16.0-48.8)        | 0.342 |
| - Creatinine (µmol/l)              | 101.0 (79.3-133.5)    | 100.5 (83.3-127.8)    | 0.735 |
| - GFR (ml/min/KO)                  | 53.8 (17.7)           | 52.4 (17.3)           | 0.963 |
| - Urea (mmol/l)                    | 7.1 (5.6-10.8)        | 7.5 (5.7-10.2)        | 0.805 |
| - Leukocyts (Gpt/l)                | 7.1 (6.2-8.2)         | 7.0 (6.2-7.9)         | 0.496 |
| - CRP (mg/l)                       | 3.5 (1.2-7.2)         | 3.1 (1.5-7.8)         | 0.615 |
| - PCT (µg/l)                       | 0.05 (0.05-0.08) [46] | 0.05 (0.05-0.08) [72] | 0.909 |
| - Interleukin-6 (pg/ml)            | 5.8 (4.0-8.3) [48]    | 7.0 (4.8-9.6) [59]    | 0.136 |
| - NTproBNP (ng/l)                  | 2082 (1463-3372) [50] | 1961 (1085-4139) [64] | 0.571 |

Values are mean ± SD, median (IQR) or n (%). If deviation from n=66, information is given with [n]. RIPC = remote ischemic preconditioning; BMI = Body-Mass-Index; LV-EF = left ventricular ejection fraction; Vmax = maximum velocity; dpmax = maximum pressure gradient; dpmean = mean pressure gradient; CAD = coronary artery disease; PCI = percutaneous coronary intervention; CABG = coronary-artery bypass grafting; ACE = angiotensin-converting enzyme; AT1 = angiotensin-1-receptor; MRA = mineral-corticoid-antagonist; AV = atrioventricular; hsTnT = high sensitive troponin T; GFR = glomerular filtration rate; CRP = C-reactive-protein; PCT = procalcitonin; NTproBNP = N-terminal pro brain natriuretic peptide

**Table S2: Standardized difference (d) of matching variables**

| Parameter             | d          |           |
|-----------------------|------------|-----------|
|                       | before PSM | after PSM |
| Gender                | 0.01       | 0.03      |
| LV-EF                 | 0.05       | 0.01      |
| CAD (stenosis > 50%)  | 0.05       | 0.09      |
| Valvetyyp             | 0.06       | 0.00      |
| n-Pacing runs         | 0.11       | 0.01      |
| Contrast amount       | 0.33       | 0.12      |
| Creatinine prior TAVI | 0.15       | 0.01      |

PSM = propensity score matching; LV-EF = left ventricular ejection fraction; CAD = coronary artery disease; TAVI = transcatheter aortic valve implantatin

**Table S3: Echocardiografic parameters of RIPC and matched control group**

|                          | RIPC group (n=66)     | Control group (n=66) | p-Value |
|--------------------------|-----------------------|----------------------|---------|
| <b>pre TAVI</b>          |                       |                      |         |
| LV-EF (%)                | 55 (47.9-60.0)        | 55 (54-60)           | 0.568   |
| Vmax (cm/sec)            | 403.6 (94.3) [53]     | 417.6 (79.4) [59]    | 0.439   |
| dpmax (mmHg)             | 67.0 (29.5) [63]      | 71.1 (25.2) [62]     | 0.907   |
| dpmean (mmHg)            | 40 (28-51) [63]       | 40 (31.3-53.8) [60]  | 0.728   |
| <b>post TAVI</b>         |                       |                      |         |
| LV-EF (%)                | 60 (50-60) [65]       | 55 (50-60) [63]      | 0.552   |
| Vmax (cm/sec)            | 200 (153.0-232.5)     | 190 (165-225) [63]   | 0.940   |
| dpmax (mmHg)             | 16 (10.0-22.5) [65]   | 15 (11-20) [61]      | 0.789   |
| dpmean (mmHg)            | 8 (5-11) [65]         | 7 (6-10) [61]        | 0.658   |
| Aortic regurgitation (°) | [65]                  | [62]                 |         |
| - 0                      | 26 (40.0)             | 19 (30.6)            | 0.527   |
| - 1                      | 36 (55.4)             | 39 (62.9)            |         |
| - 2                      | 1 (1.5)               | 2 (3.2)              |         |
| - 3                      | 2 (3.1)               | 2 (3.2)              |         |
| <b>follow up 1</b>       |                       |                      |         |
| LV-EF (%)                | 60 (53-60) [47]       | 60 (50-60) [44]      | 0.682   |
| Vmax (cm/sec)            | 195.0 (38.7) [46]     | 185.9 (43.3) [43]    | 0.921   |
| dpmax (mmHg)             | 15.5 (11.8-19.0) [46] | 13 (11-18) [44]      | 0.749   |
| dpmean (mmHg)            | 8 (6-11) [46]         | 7 (5-10) [42]        | 0.744   |
| Aortic regurgitation (°) | [48]                  | [45]                 | 0.240   |
| - 0                      | 19 (39.6)             | 13 (28.9)            |         |

|                          |                     |                     |       |
|--------------------------|---------------------|---------------------|-------|
| - 1                      | 29 (60.4)           | 30 (66.7)           |       |
| - 2                      | 0 (0)               | 0 (0)               |       |
| - 3                      | 0 (0)               | 2 (4.4)             |       |
| <b>follow up 2</b>       |                     |                     |       |
| LV-EF (%)                | 60 (55-60) [38]     | 55 (55-60) [40]     | 0.780 |
| Vmax (cm/sec)            | 197.1 (48.0) [34]   | 192.8 (39.0) [37]   | 0.330 |
| dpmax (mmHg)             | 15 (11.5-21.0) [37] | 14 (11.0-18.3) [38] | 0.457 |
| dpmean (mmHg)            | 8 (5-10) [35]       | 8 (5.5-10.0) [37]   | 0.721 |
| Aortic regurgitation (°) | [36]                | [40]                |       |
| - 0                      | 15 (41.7)           | 13 (32.5)           |       |
| - 1                      | 21 (58.3)           | 22 (55.0)           | 0.460 |
| - 2                      | 0 (0)               | 4 (10.0)            |       |
| - 3                      | 0 (0)               | 1 (2.5)             |       |

Values are mean  $\pm$  SD, median (IQR) or n (%). If deviation from n=66, information is given with [n]. RIPC = remote ischemic preconditioning; LV-EF = left ventricular ejection fraction; Vmax = maximum velocity; dpmax = maximum pressure gradient; dpmean = mean pressure gradient
